# Supplementary material
Source: PubMed Central journal article supplement (PMC5123759)

Figure S1

a

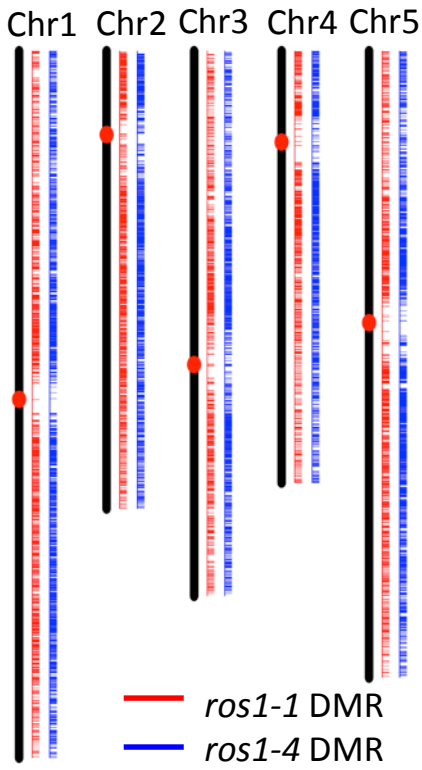

b

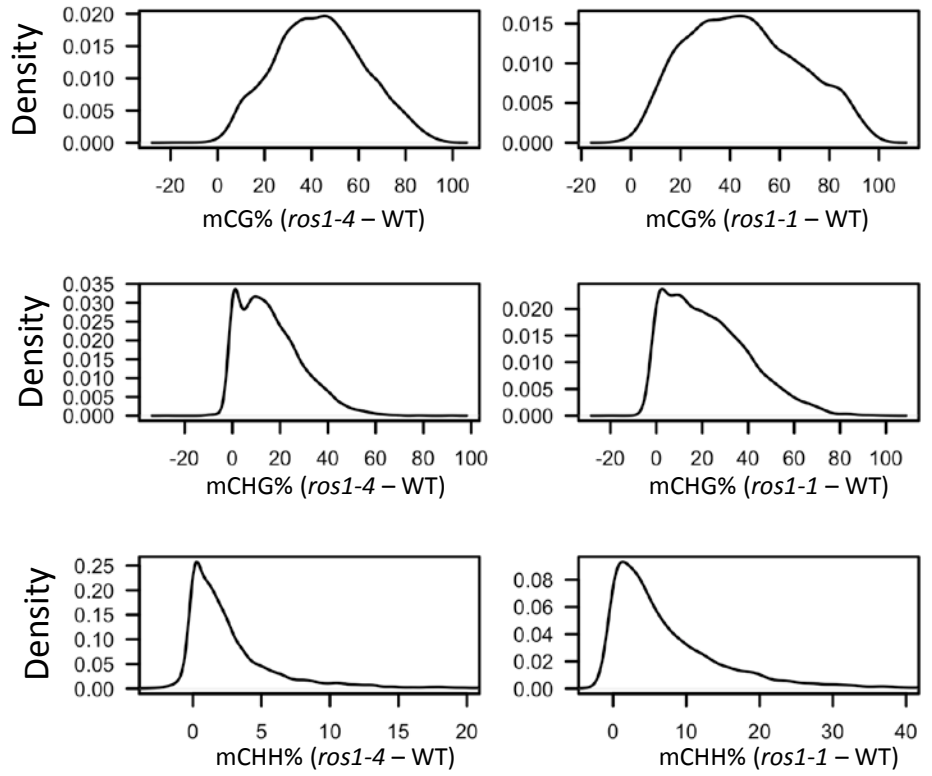

c

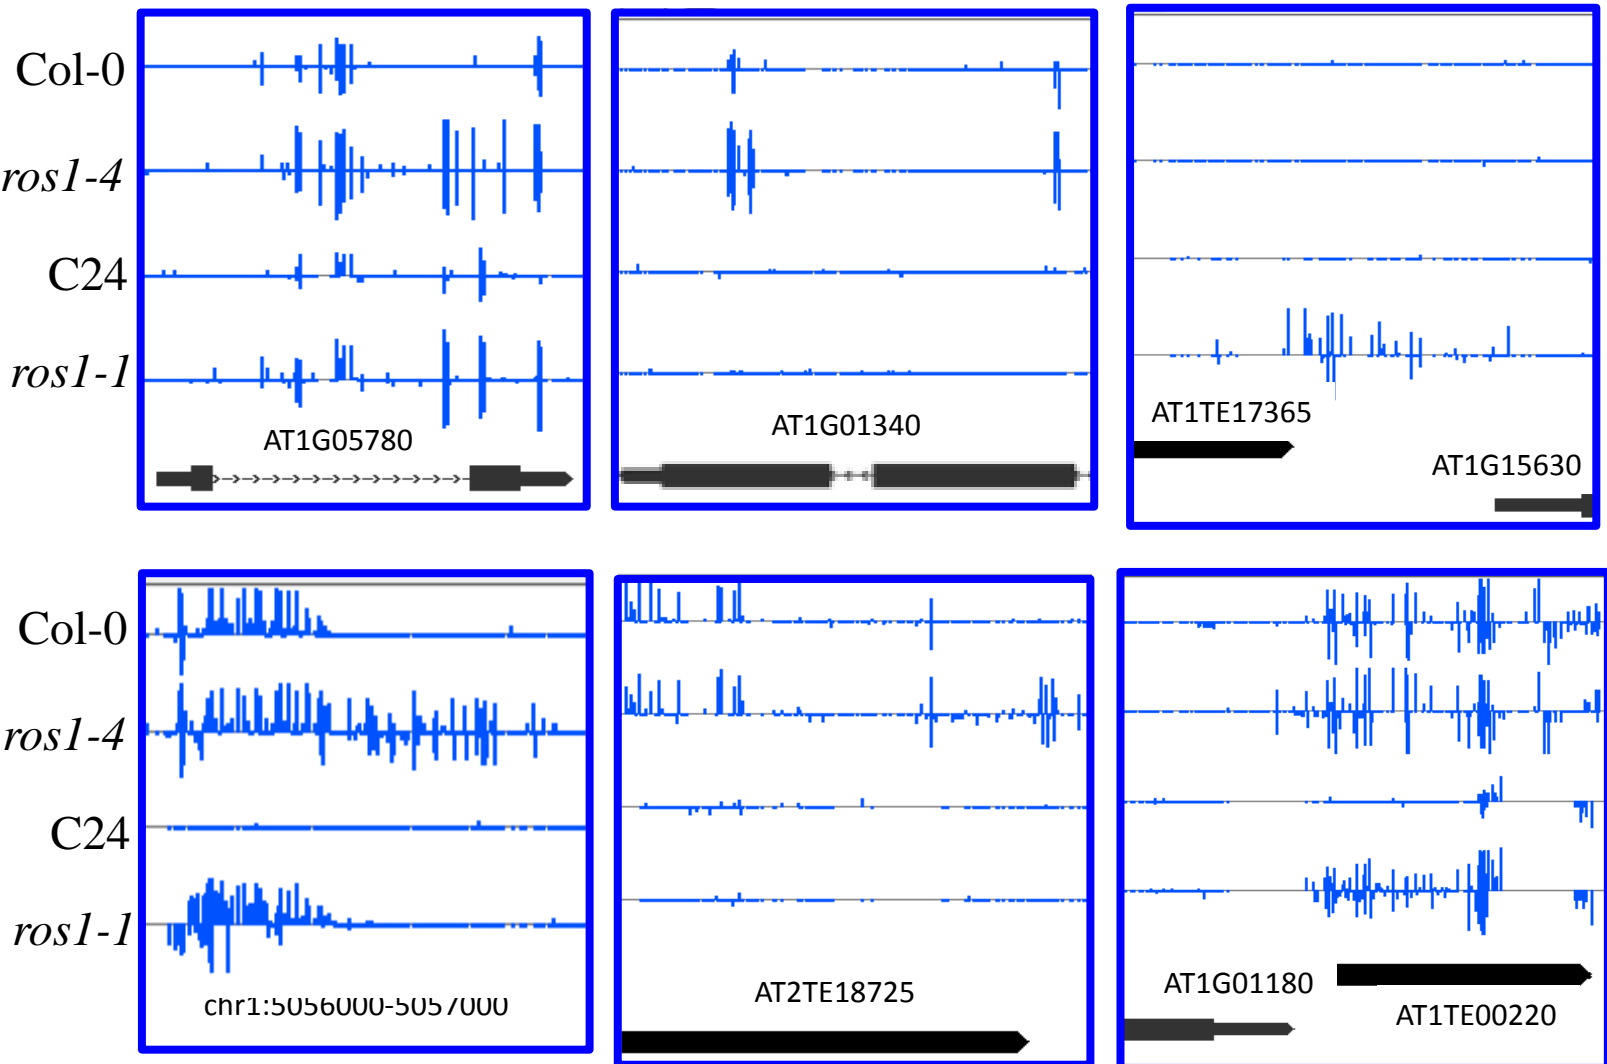

Supplement: NIHMS820857-supplement-1.pdf [file NIHMS820857-supplement-1.pdf]

Figure S2

a

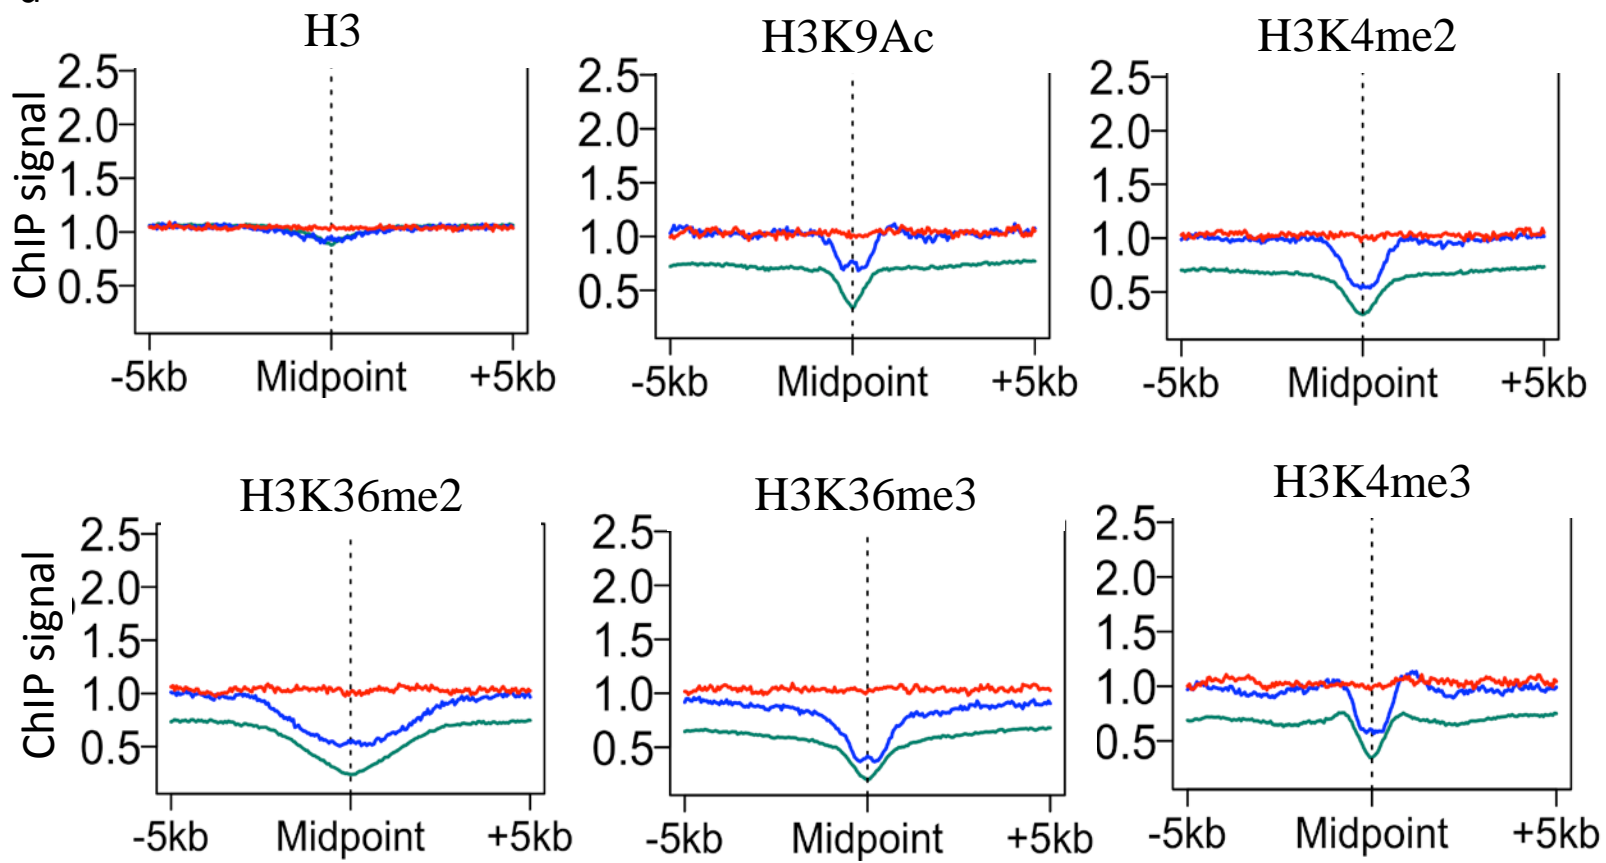

b

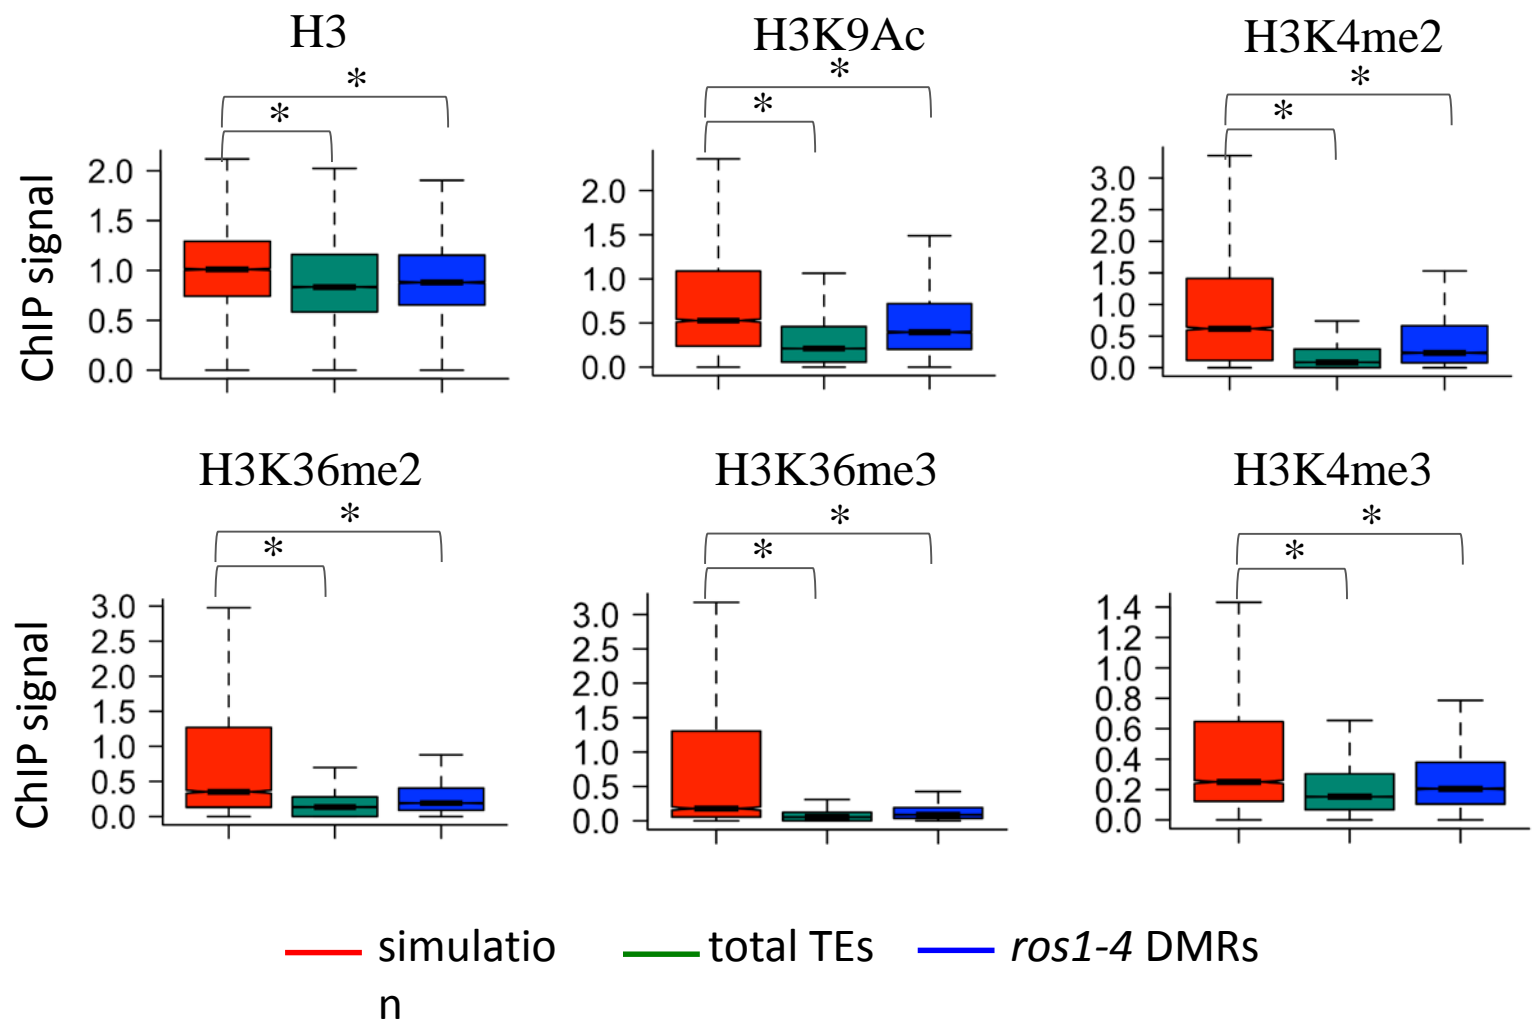

c

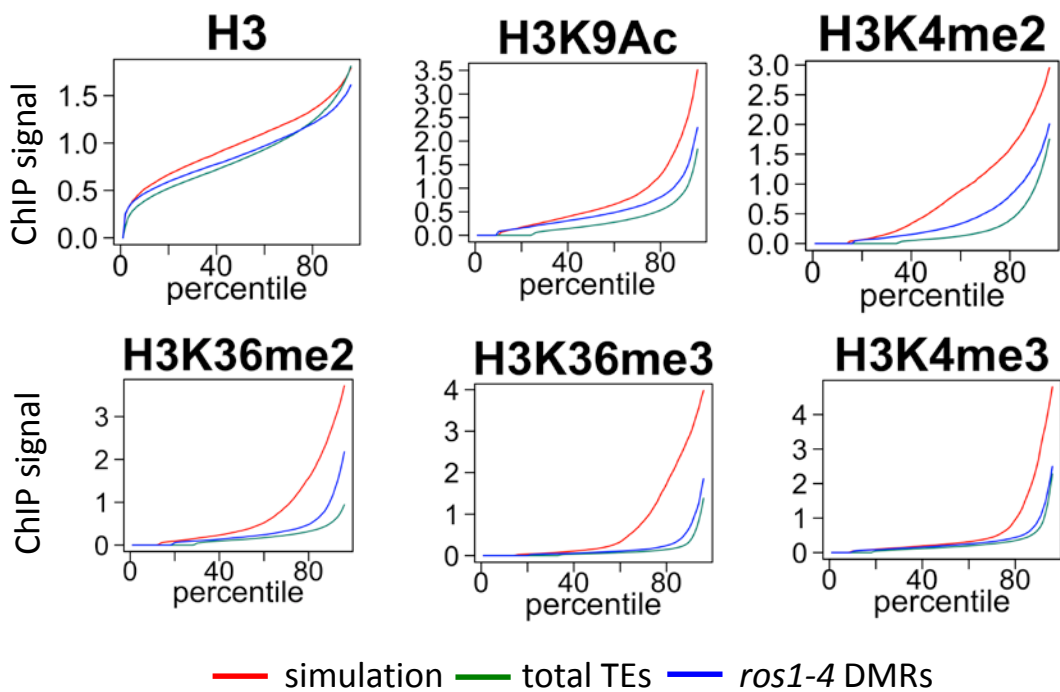

d

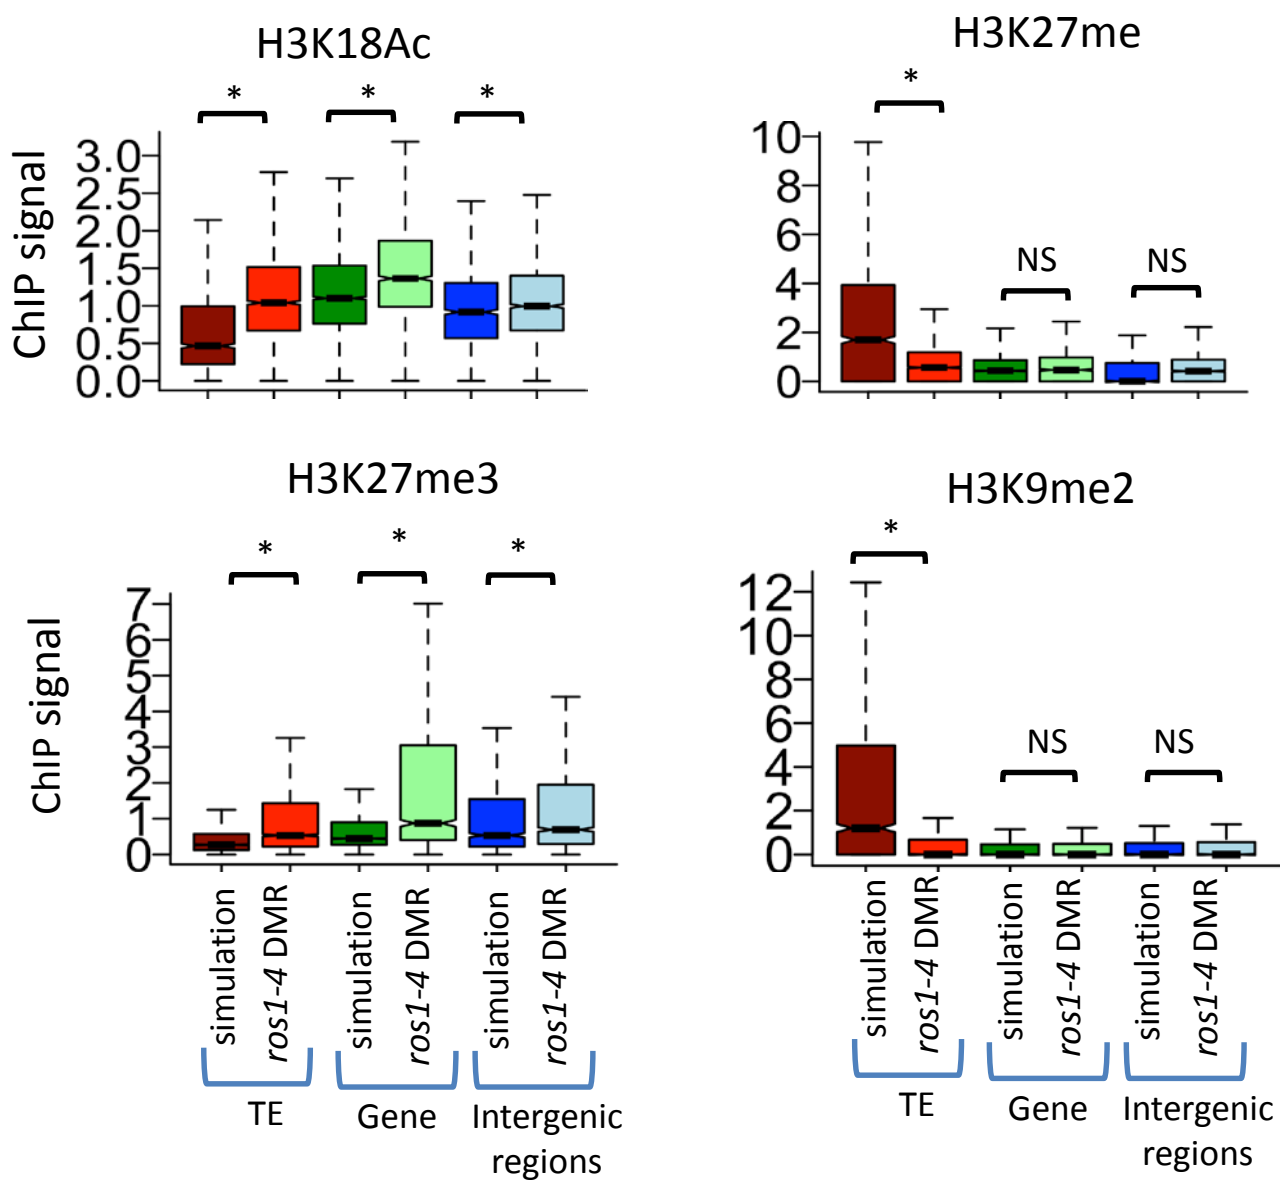

Supplement: NIHMS820857-supplement-2.pdf [file NIHMS820857-supplement-2.pdf]

Figure S3

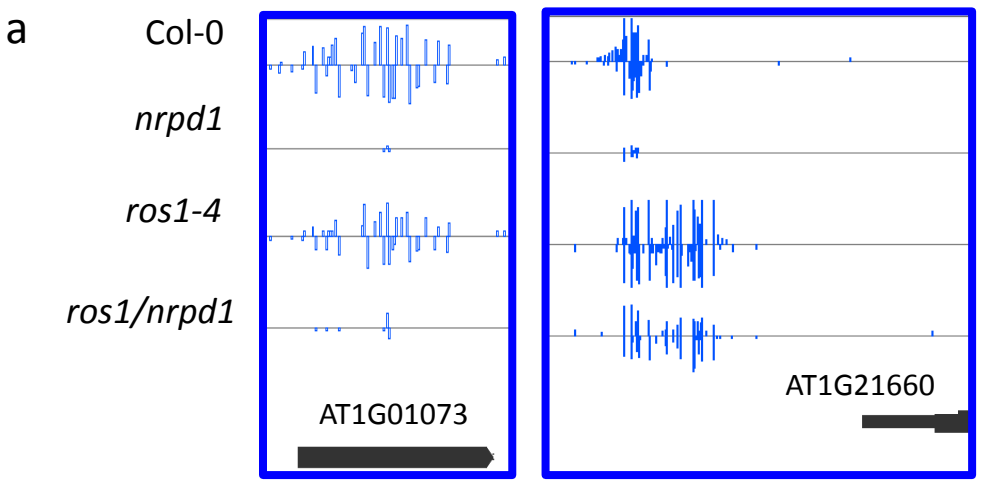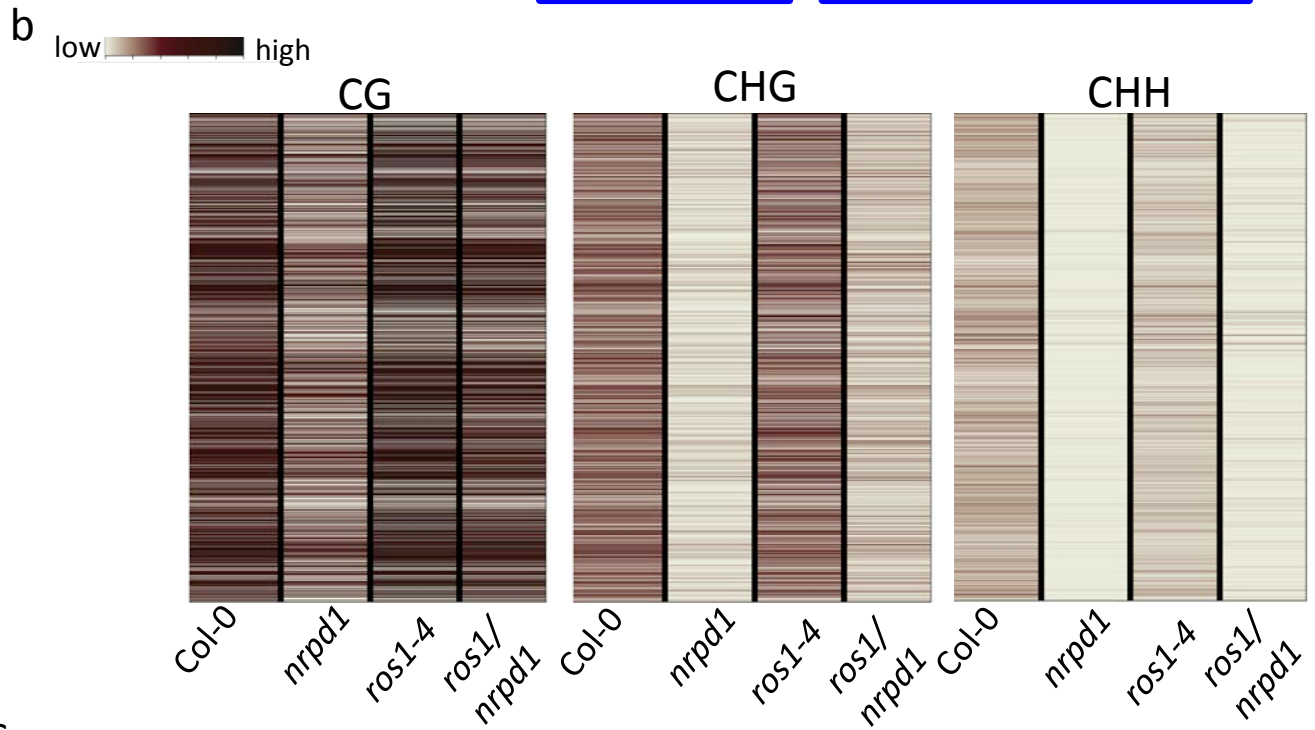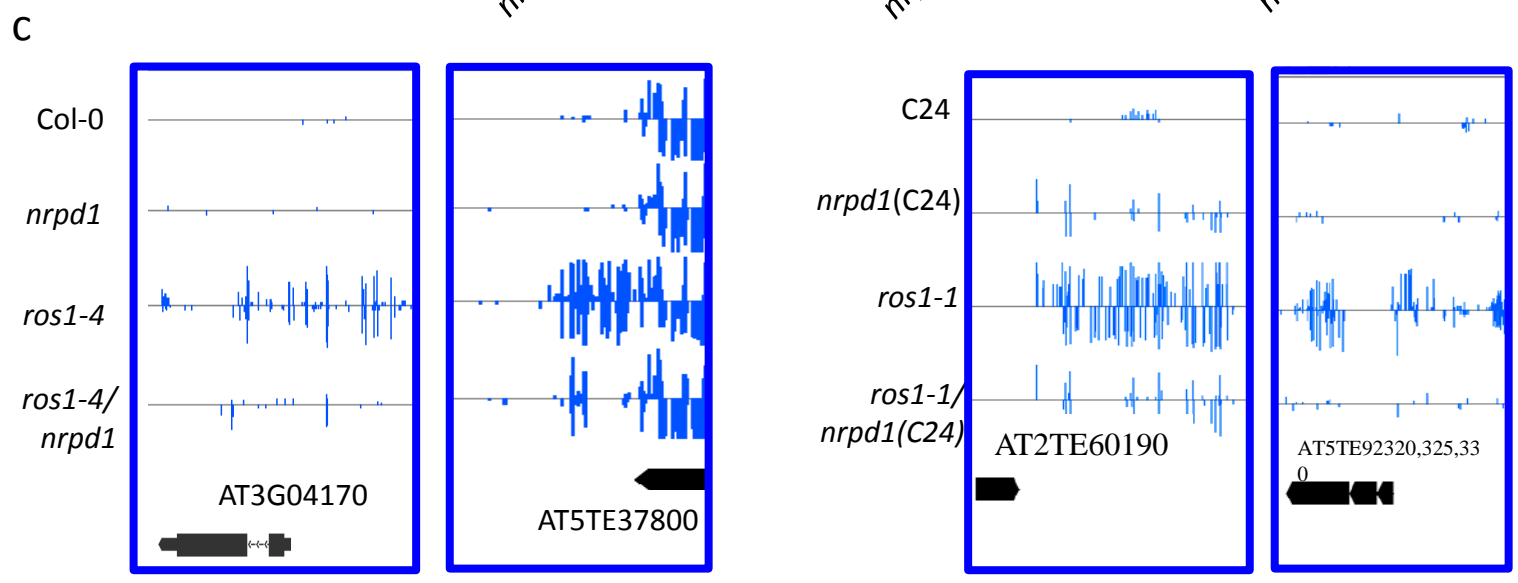

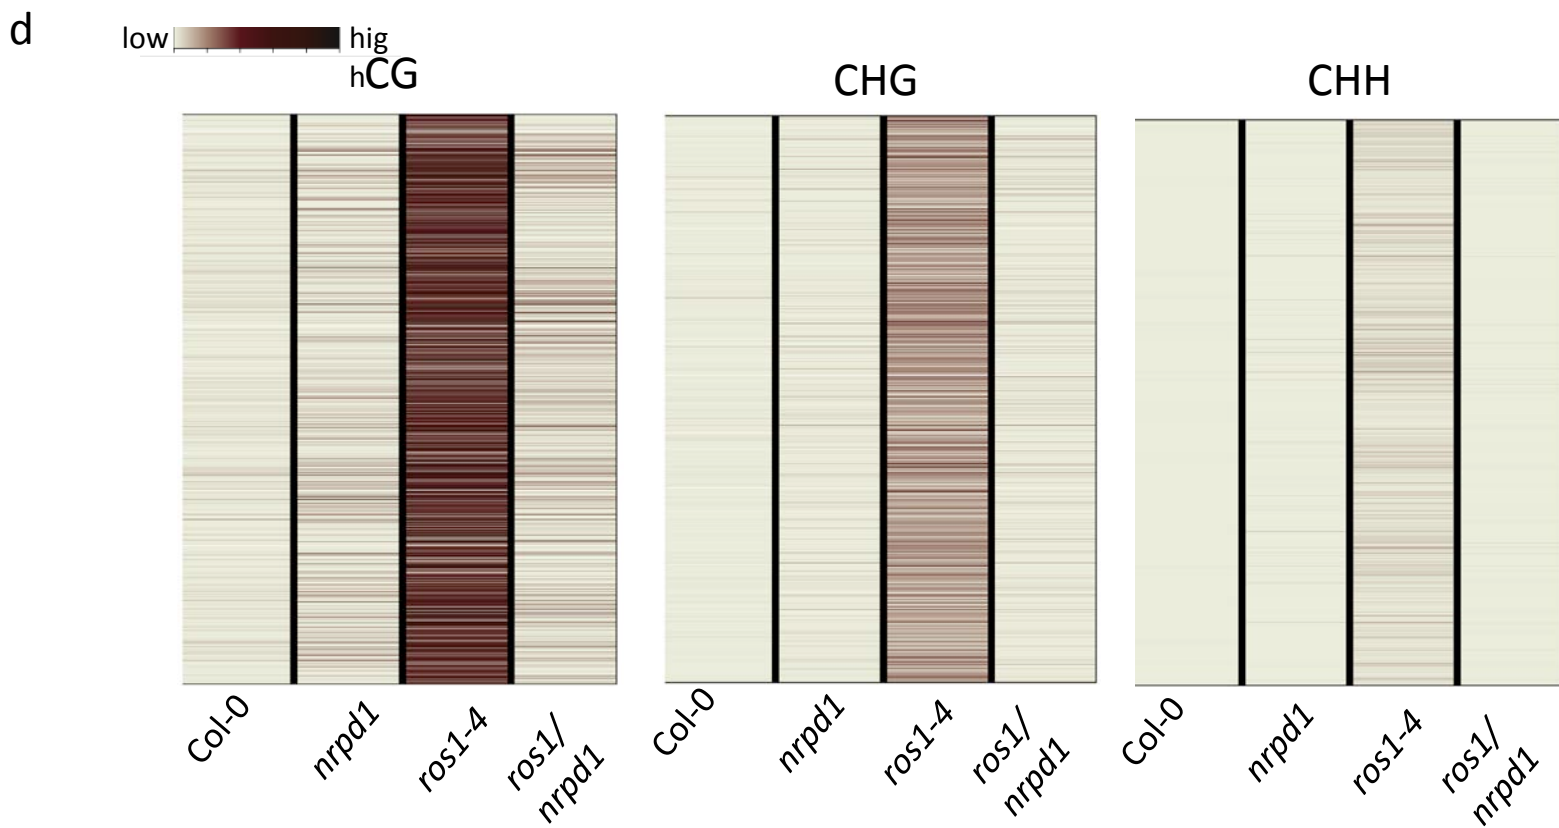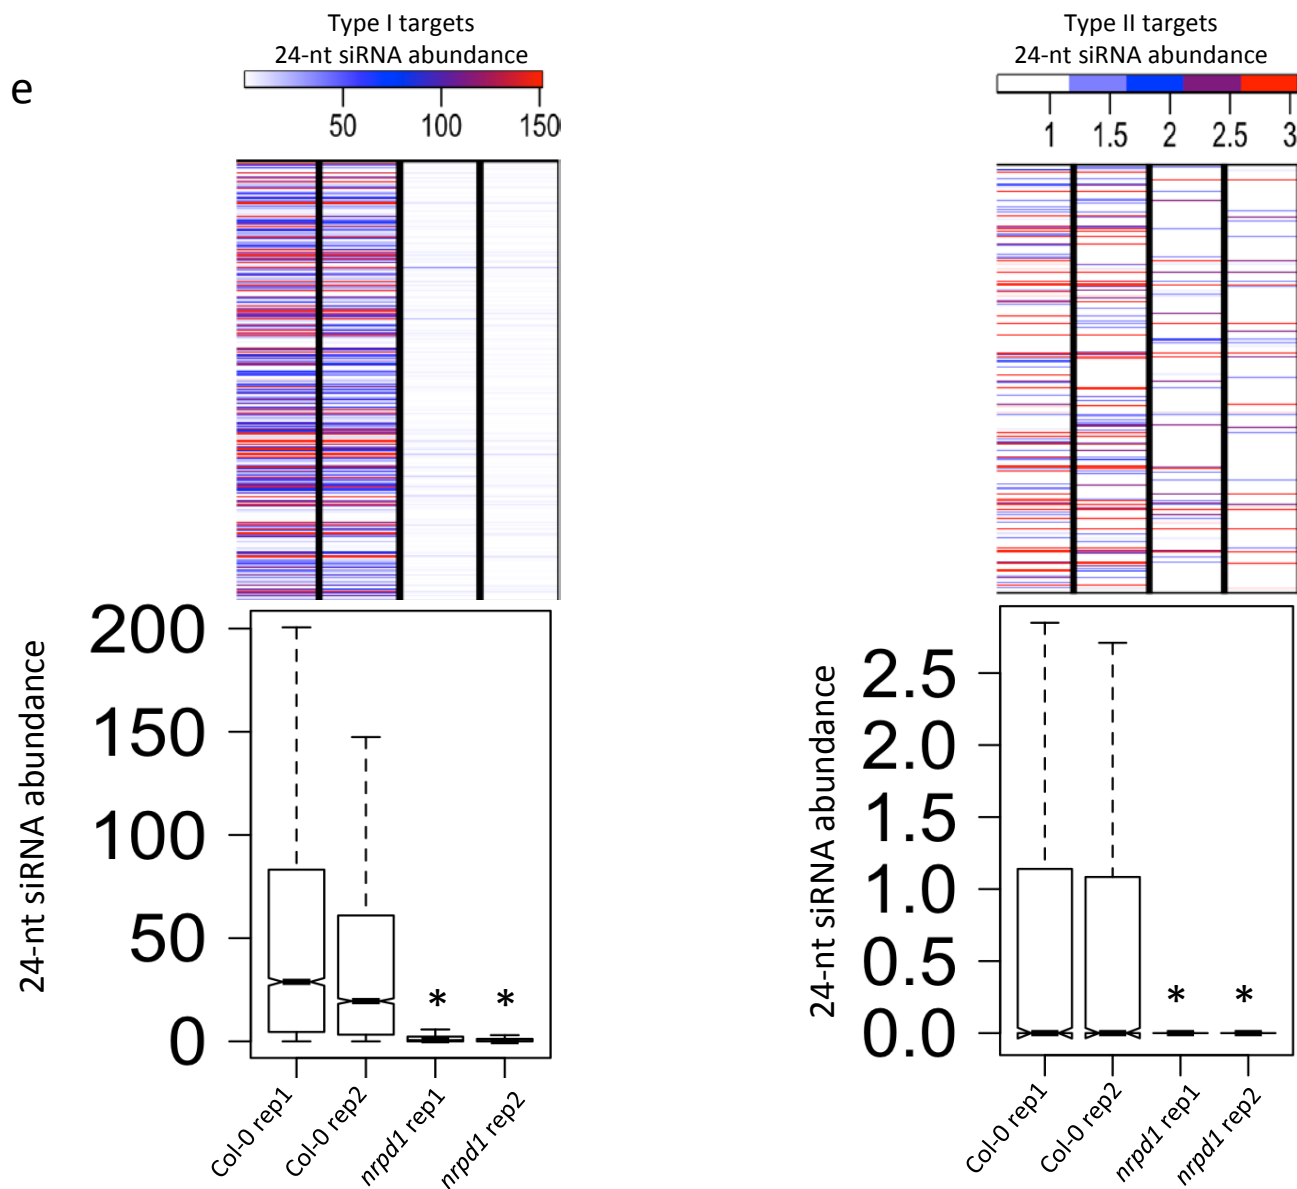

Supplement: NIHMS820857-supplement-3.pdf [file NIHMS820857-supplement-3.pdf]

Figure S4

a

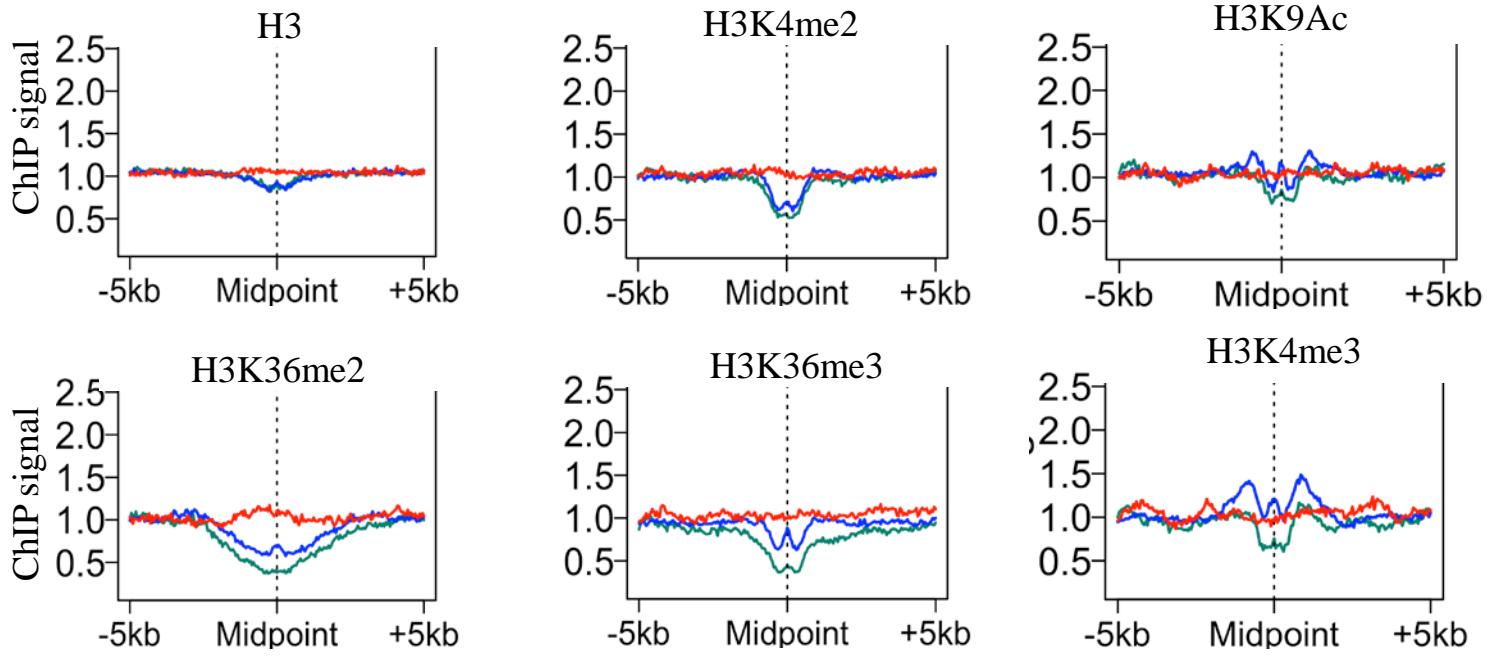

b

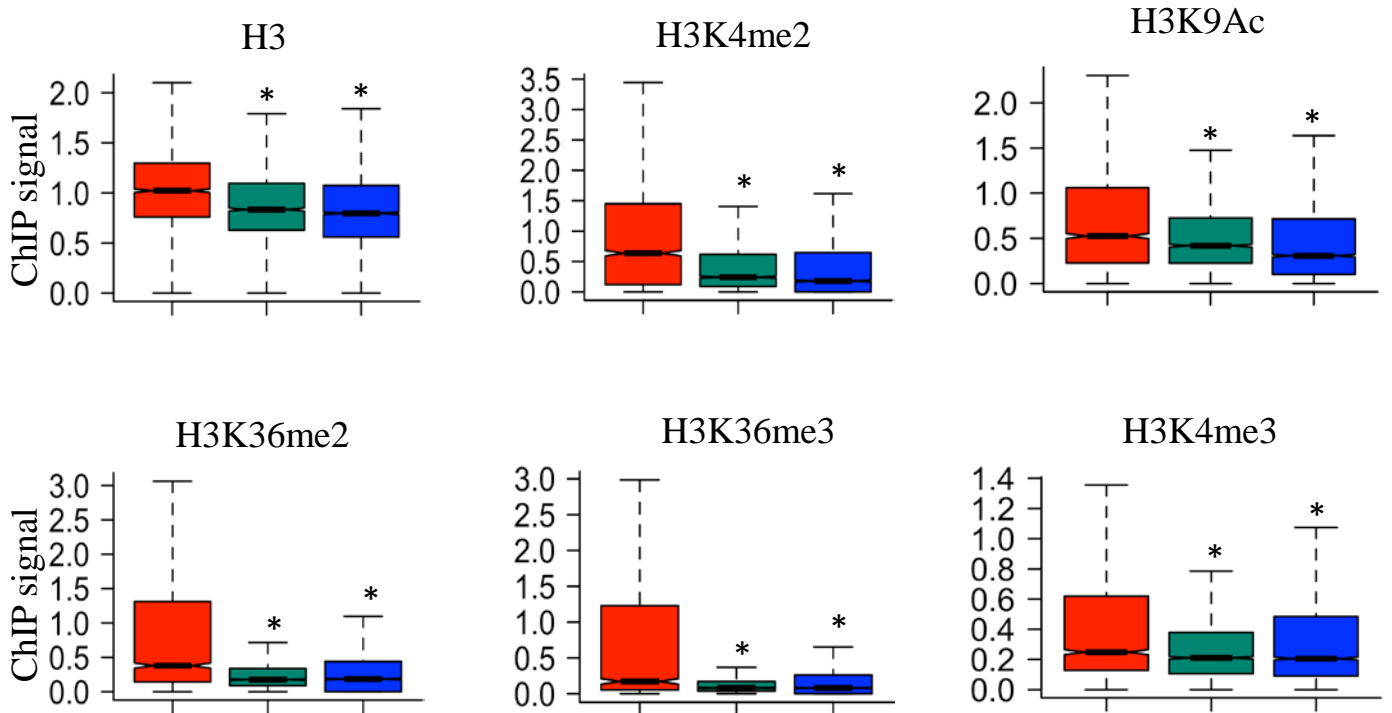

— simulation    — Type II targets    — Type I targets

c

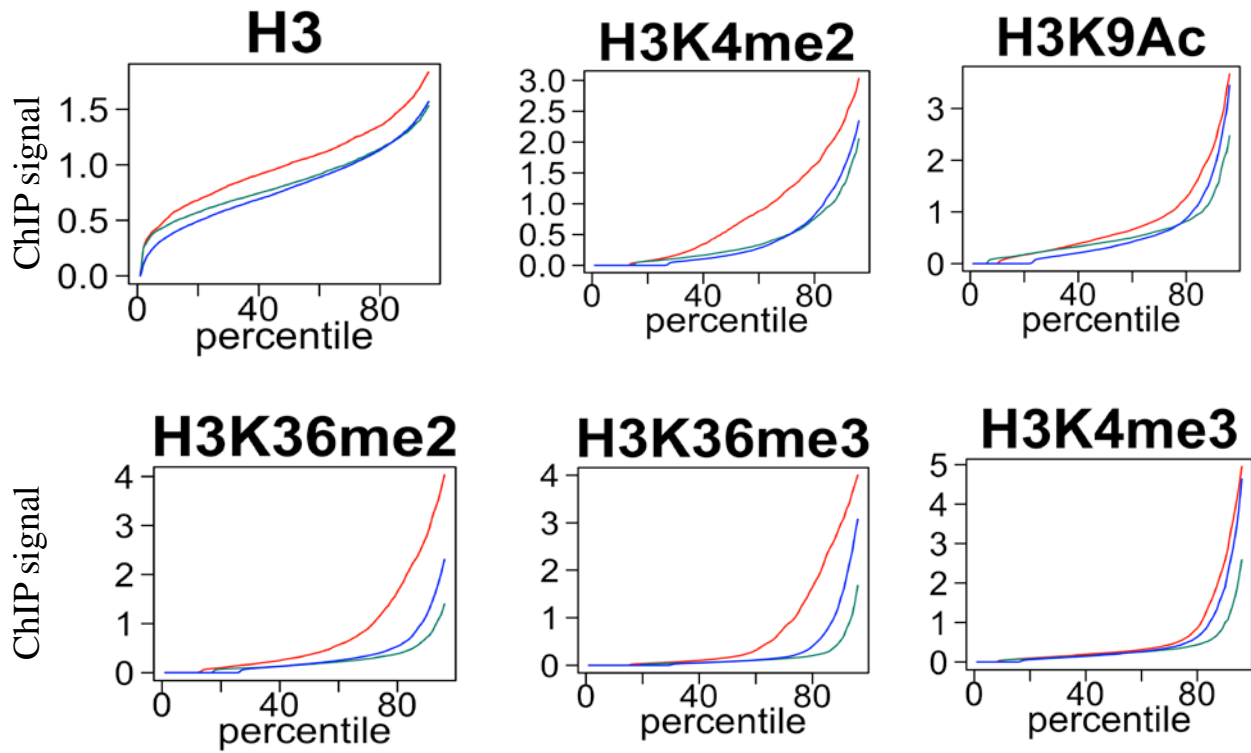

d

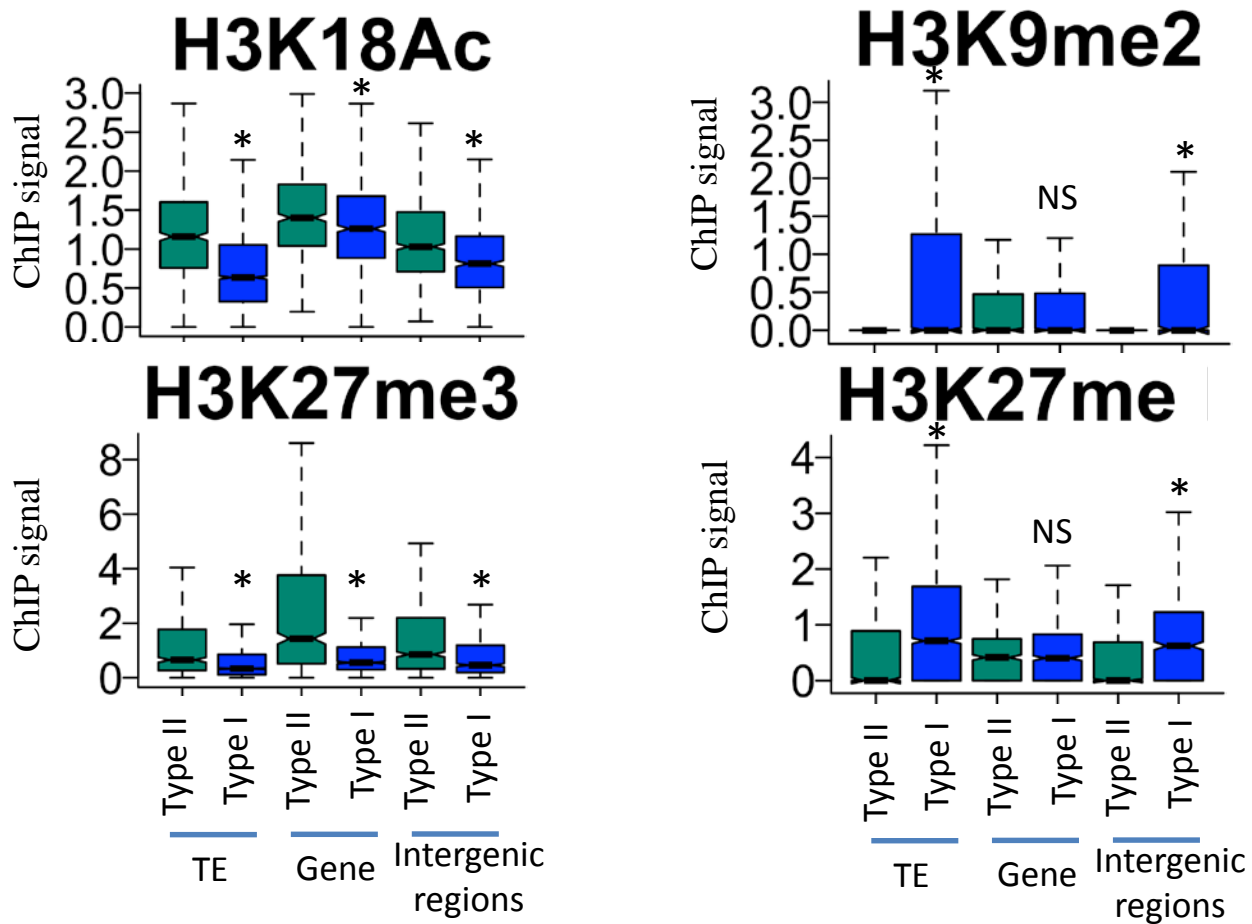

e

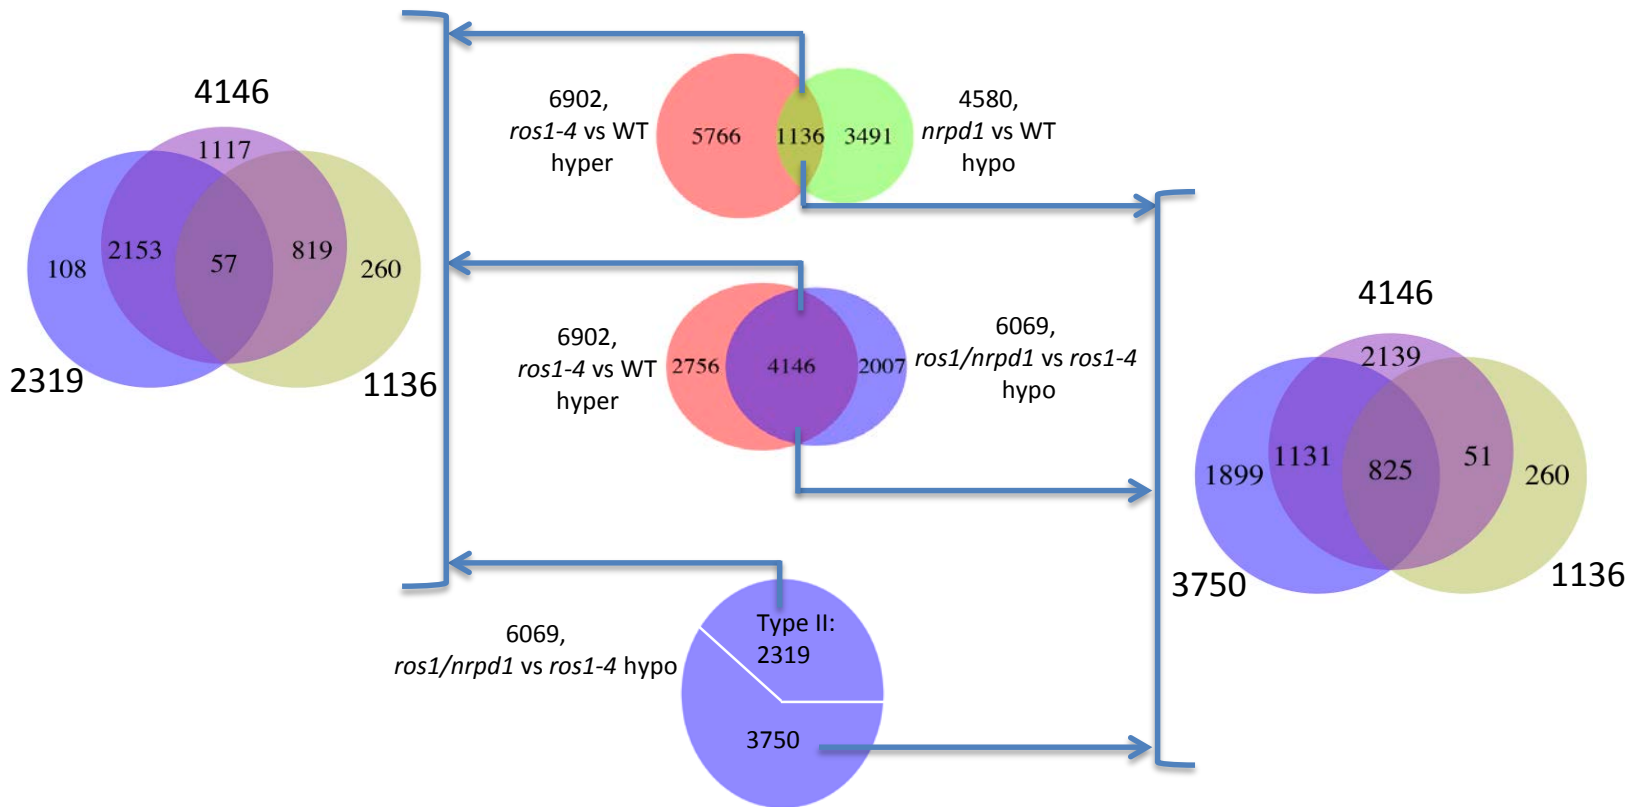

Supplement: NIHMS820857-supplement-4.pdf [file NIHMS820857-supplement-4.pdf]

Figure S6

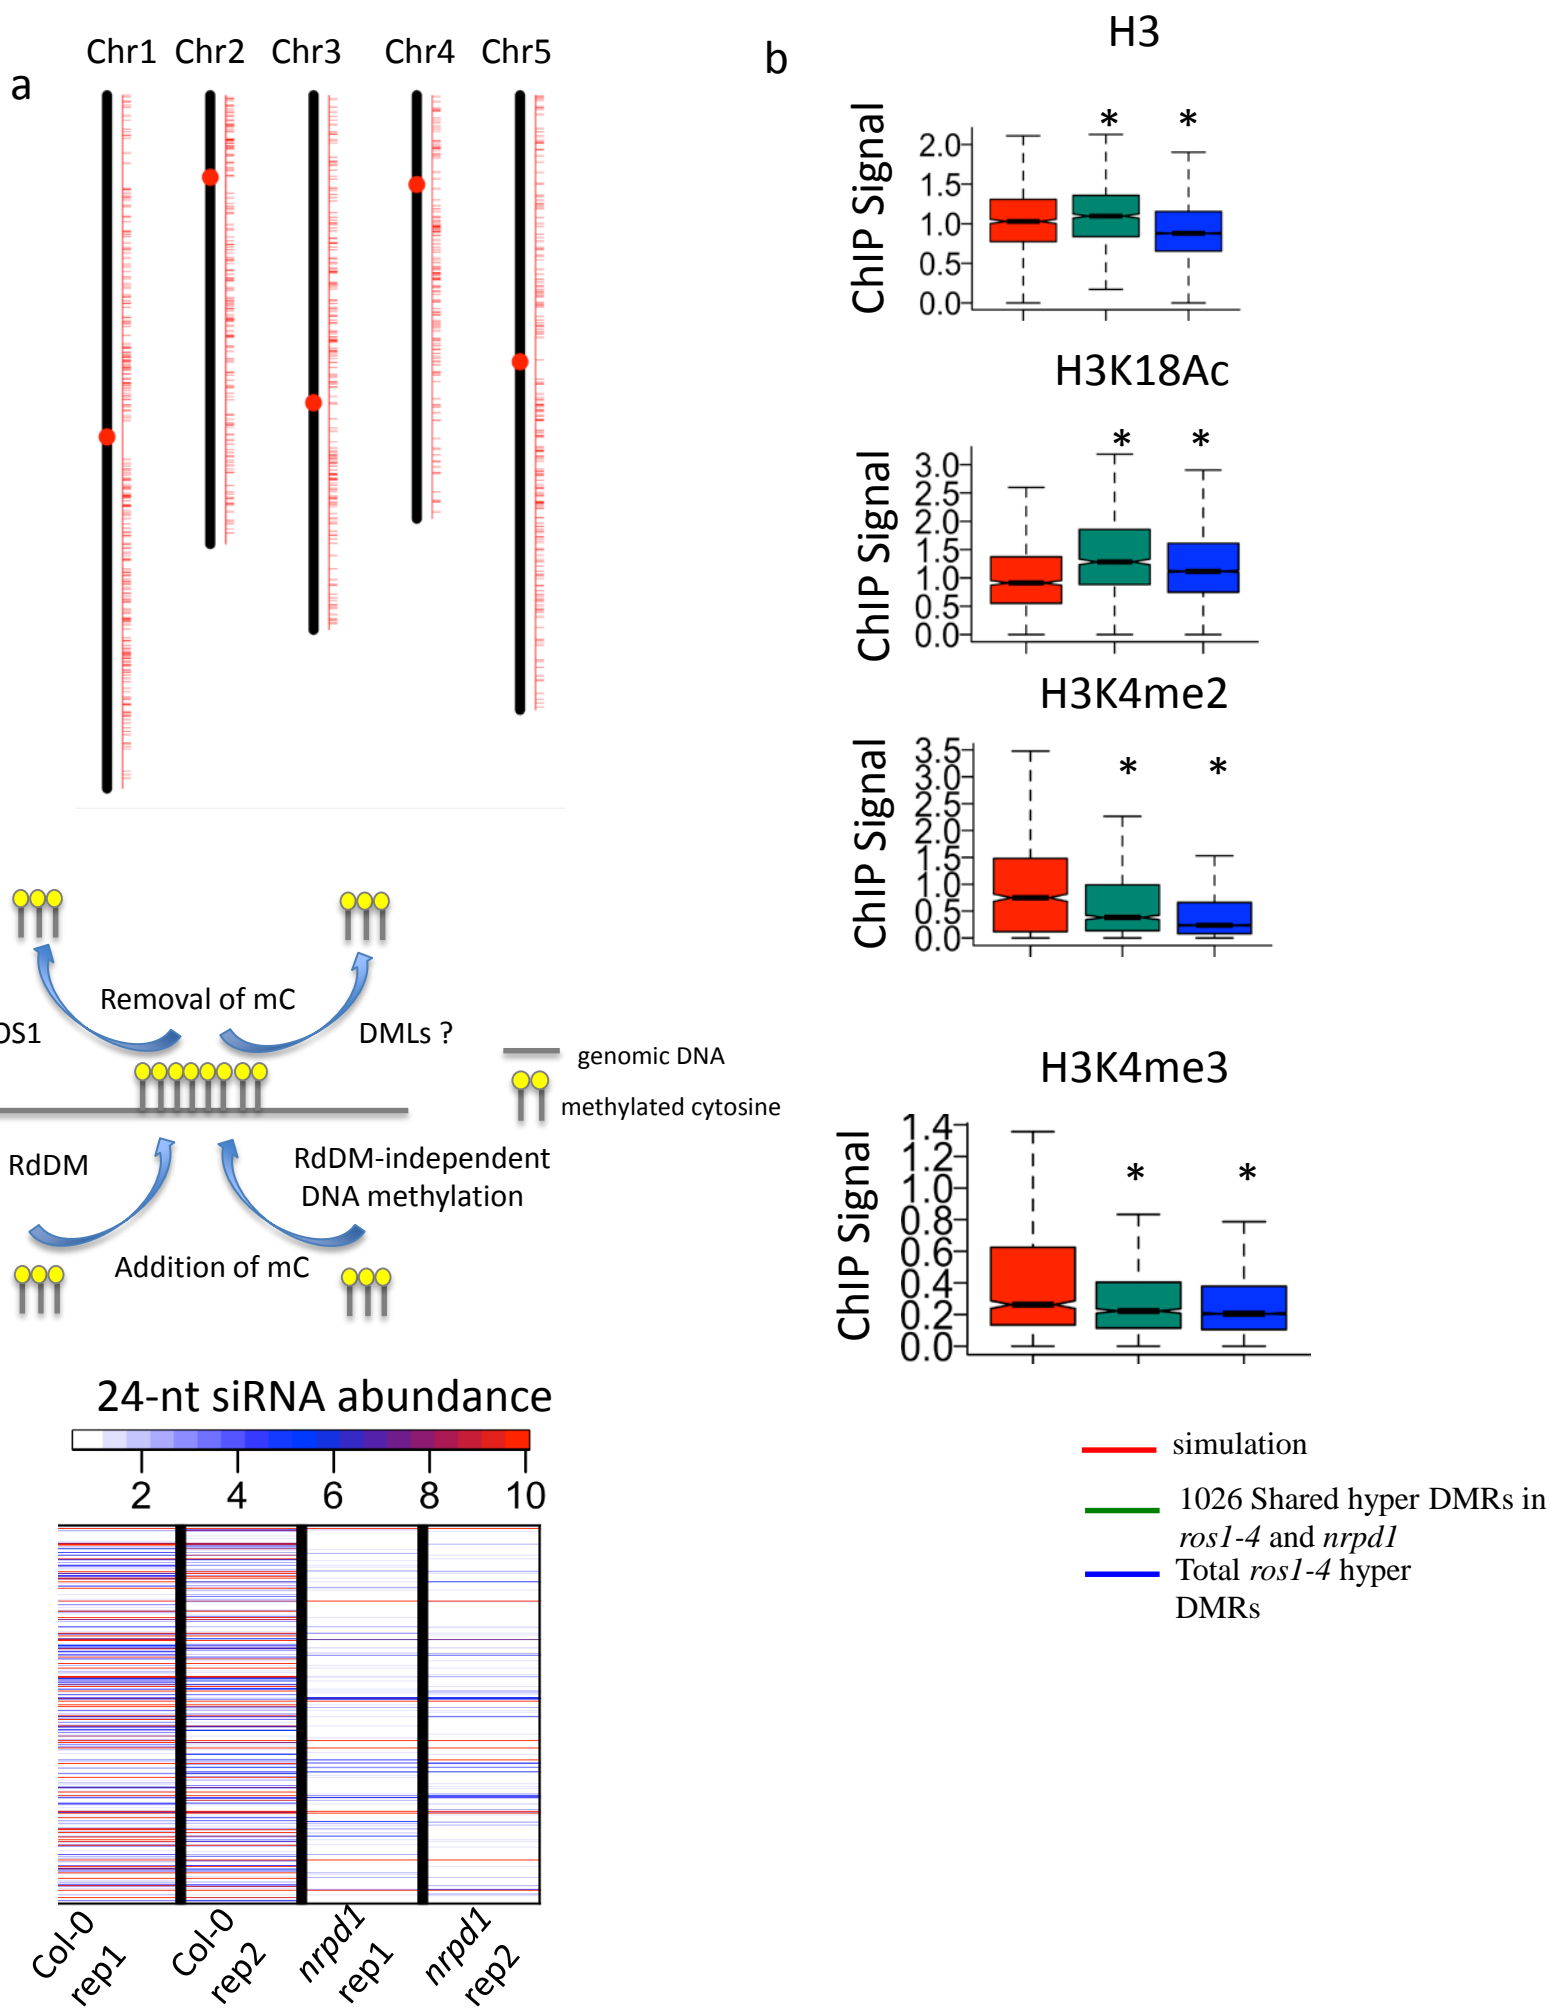

Supplement: NIHMS820857-supplement-6.pdf [file NIHMS820857-supplement-6.pdf]
